# Supplementary material for: Assessment and Prediction of the Water Quality Index for the Groundwater of the Ghiss-Nekkor (Al Hoceima, Northeastern Morocco)
Source: MDPI journal article supplement (doi:10.3390/su15010402), 2022-12-26
Supplement: s1 [file s1]

**Suppl. Table S1 .** Water quality index (WQI) classification for individual samples

| Wells | WQI    | Water quality classification type      | Ionic balance | CO32- | pH   | SAR   | RSC (meq/L) | PI (%) | Salinity | Deep  |
|-------|--------|----------------------------------------|---------------|-------|------|-------|-------------|--------|----------|-------|
| W1    | 225.49 | Very poor water                        | -9            | 0     | 7.51 | 5.00  | -25.71      | 43.06  | 3.46     | 3.77  |
| W2    | 227.81 | Very poor water                        | -8            | 0     | 7.44 | 5.10  | -25.14      | 44.52  | 3.34     | 1.78  |
| W3    | 233.64 | Very poor water                        | -9            | 0     | 7.11 | 4.84  | -28.14      | 41.28  | 3.41     | 4.74  |
| W4    | 197.14 | poor water                             | -5            | 0     | 7.28 | 4.51  | -25.78      | 41.02  | 2.84     | 2.07  |
| W5    | 131.14 | Poor water                             | -1            | 0     | 7.44 | 3.81  | -15.21      | 44.34  | 1.74     | 2.07  |
| W6    | 132.78 | Poor water                             | 9             | 0     | 7.33 | 3.81  | -16.80      | 43.01  | 1.86     | 4.01  |
| W7    | 209.06 | Very poor water                        | -9            | 0     | 7.40 | 4.39  | -27.97      | 39.43  | 3.05     | 1.57  |
| W8    | 103.26 | Poor water                             | 2             | 0     | 7.90 | 3.33  | -14.21      | 42.51  | 1.23     | 5.13  |
| W9    | 103.02 | Poor water                             | -2            | 0     | 7.75 | 3.18  | -14.03      | 41.39  | 1.18     | 5.30  |
| W10   | 247.95 | Very poor water                        | -9            | 0     | 7.39 | 5.51  | -28.46      | 44.03  | 3.99     | 7.12  |
| W11   | 186.67 | Poor water                             | -4            | 0     | 8.01 | 7.26  | -7.59       | 66.71  | 2.05     | 25.60 |
| W12   | 125.68 | Poor water                             | -2            | 0     | 7.51 | 6.52  | -6.99       | 63.67  | 2.06     | 34.50 |
| W13   | 291.59 | Very poor water                        | -10           | 0     | 7.71 | 10.88 | -17.97      | 65.09  | 4.74     | 5.45  |
| W14   | 198.94 | Poor water                             | -9            | 0     | 7.71 | 7.92  | -12.23      | 62.90  | 3.4      | 7.04  |
| W15   | 92.24  | Good water                             | -4            | 0     | 7.79 | 4.77  | -5.95       | 60.29  | 1.22     | 21.40 |
| W16   | 337.28 | Water unsuitable for drinking purposes | -8            | 0     | 7.75 | 10.62 | -21.65      | 62.36  | 5.35     | 3.80  |
| W17   | 206.53 | Very poor water                        | -8            | 0     | 7.67 | 4.84  | -23.31      | 43.62  | 2.95     | 4.10  |
| W18   | 161.81 | Poor water                             | -5            | 0     | 7.70 | 5.10  | -16.05      | 49.82  | 2.38     | 4.69  |
| W19   | 118.8  | Poor water                             | -4            | 0     | 7.33 | 4.20  | -11.98      | 48.76  | 1.68     | 48.00 |
| W20   | 235.53 | Very poor water                        | -5            | 0     | 7.37 | 11.60 | -15.00      | 67.77  | 3.55     | 48.60 |
| W21   | 120.79 | Poor water                             | -3            | 0     | 7.37 | 3.80  | -13.48      | 45.77  | 1.64     | 14.80 |
| W22   | 123.29 | Poor water                             | -1            | 0     | 7.01 | 3.42  | -15.95      | 41.36  | 1.81     | 8.48  |
| W23   | 133.05 | Poor water                             | 6             | 0     | 6.84 | 3.81  | -22.19      | 39.37  | 1.46     | 9.55  |
| W24   | 194.92 | Poor water                             | -3            | 0     | 6.59 | 4.94  | -20.92      | 45.51  | 2.97     | 16.63 |
| W25   | 174.68 | Poor water                             | 1             | 0     | 6.69 | 4.80  | -20.93      | 44.87  | 2.61     | 14.30 |

|     |        |                 |    |   |      |      |        |       |      |       |
|-----|--------|-----------------|----|---|------|------|--------|-------|------|-------|
| W26 | 105.42 | Poor water      | 7  | 0 | 7.23 | 3.80 | -17.27 | 42.42 | 1.27 | 5.07  |
| W27 | 121.07 | Poor water      | 2  | 0 | 6.79 | 4.01 | -21.12 | 41.06 | 1.31 | 7.42  |
| W28 | 121.27 | Poor water      | 9  | 0 | 7.00 | 3.39 | -17.08 | 40.42 | 1.74 | 13.75 |
| W29 | 259.92 | Very poor water | -6 | 0 | 6.85 | 5.36 | -30.74 | 42.49 | 4.16 | 16.50 |
| W30 | 187.19 | Poor water      | 2  | 0 | 7.02 | 5.17 | -22.24 | 45.93 | 2.95 | 28.00 |
| W31 | 172.62 | Poor water      | -9 | 0 | 7.01 | 3.32 | -17.59 | 39.38 | 2.84 | 33.50 |
| W32 | 112.17 | Poor water      | 4  | 0 | 7.39 | 3.20 | -16.08 | 40.18 | 1.53 | 40.00 |
| W33 | 147.48 | Poor water      | -1 | 0 | 7.61 | 5.75 | -12.49 | 55.49 | 2.2  | 29.50 |
| W34 | 156.52 | Poor water      | -7 | 0 | 7.14 | 6.55 | -9.91  | 60.21 | 2.66 | 49.70 |
| W35 | 184.69 | Poor water      | -6 | 0 | 8.00 | 6.84 | -14.25 | 57.63 | 2.94 | 46.00 |
| W36 | 143.83 | Poor water      | 0  | 0 | 6.78 | 5.01 | -15.27 | 50.01 | 2.18 | 43.00 |
| W37 | 196.68 | Poor water      | -7 | 0 | 7.24 | 7.56 | -11.97 | 62.20 | 3.17 | 9.33  |
| W38 | 149.36 | Poor water      | 1  | 0 | 7.65 | 4.68 | -15.58 | 48.57 | 2.29 | 37.34 |
| W39 | 92.07  | Good water      | 2  | 0 | 7.23 | 3.68 | -8.51  | 51.25 | 1.21 | 14.40 |
| W40 | 194.22 | Poor water      | -7 | 0 | 7.17 | 5.98 | -14.77 | 54.48 | 3.3  | 23.65 |
| W41 | 179.57 | Poor water      | -1 | 0 | 7.34 | 4.78 | -18.87 | 45.91 | 2.47 | 2.13  |
| W42 | 145.35 | Poor water      | -7 | 0 | 6.95 | 5.76 | -10.06 | 54.76 | 2.11 | 4.16  |
| W43 | 135.86 | Poor water      | 6  | 0 | 7.41 | 3.14 | -18.31 | 38.03 | 2.03 | 22.24 |
| W44 | 209.68 | Very poor water | -5 | 0 | 7.53 | 5.58 | -21.62 | 47.65 | 3.43 | 54.55 |
| W45 | 122.19 | Poor water      | -5 | 0 | 7.52 | 6.59 | -4.61  | 65.45 | 1.9  | 2.40  |
| W46 | 167    | Poor water      | 1  | 0 | 7.50 | 4.47 | -22.16 | 42.88 | 2.62 | 24.20 |
| W47 | 115.76 | Poor water      | 5  | 0 | 7.32 | 3.96 | -13.21 | 47.10 | 1.67 | 40.50 |
| W48 | 90.98  | Good water      | 7  | 0 | 7.13 | 3.43 | -8.16  | 48.71 | 1.34 | 60.70 |
| W49 | 128.28 | Poor water      | 0  | 0 | 7.32 | 4.51 | -13.14 | 49.51 | 1.85 | 69.50 |
| W50 | 154.83 | Poor water      | -8 | 0 | 6.88 | 6.54 | -10.14 | 60.47 | 2.6  | 45.94 |

---

**Suppl. Table S2.** Correlation coefficient matrix of Ghiss Nekkork groundwater chemical parameters

|              | <b>TDS</b> | <b>pH</b> | <b>T</b> | <b>EC</b> | <b>Na.</b> | <b>K.</b> | <b>NO3.</b> | <b>HCO3.</b> | <b>Ca2.</b> | <b>Mg2.</b> | <b>Cl.</b> | <b>SO42.</b> | <b>Br.</b> | <b>WQI</b> |
|--------------|------------|-----------|----------|-----------|------------|-----------|-------------|--------------|-------------|-------------|------------|--------------|------------|------------|
| <b>TDS</b>   | 1          |           |          |           |            |           |             |              |             |             |            |              |            |            |
| <b>pH</b>    | 0.06       | 1         |          |           |            |           |             |              |             |             |            |              |            |            |
| <b>T</b>     | 0          | -0.42     | 1        |           |            |           |             |              |             |             |            |              |            |            |
| <b>EC</b>    | 1          | 0.09      | -0.01    | 1         |            |           |             |              |             |             |            |              |            |            |
| <b>Na.</b>   | 0.88       | 0.16      | -0.04    | 0.87      | 1          |           |             |              |             |             |            |              |            |            |
| <b>K.</b>    | 0.37       | 0.36      | -0.3     | 0.37      | 0.42       | 1         |             |              |             |             |            |              |            |            |
| <b>NO3.</b>  | 0.29       | 0.24      | -0.27    | 0.29      | 0.32       | 0.83      | 1           |              |             |             |            |              |            |            |
| <b>HCO3.</b> | 0.33       | -0.23     | 0.21     | 0.32      | 0.37       | -0.08     | -0.15       | 1            |             |             |            |              |            |            |
| <b>Ca2.</b>  | 0.38       | -0.23     | -0.35    | 0.38      | 0.18       | -0.13     | -0.14       | 0.16         | 1           |             |            |              |            |            |
| <b>Mg2.</b>  | 0.65       | -0.26     | 0.06     | 0.64      | 0.43       | 0.03      | -0.05       | 0.38         | 0.66        | 1           |            |              |            |            |
| <b>Cl.</b>   | 0.92       | 0.12      | -0.01    | 0.92      | 0.89       | 0.46      | 0.32        | 0.31         | 0.2         | 0.56        | 1          |              |            |            |
| <b>SO42.</b> | 0.36       | -0.06     | -0.31    | 0.35      | 0.23       | -0.14     | -0.17       | 0.22         | 0.84        | 0.56        | 0.1        | 1            |            |            |
| <b>Br.</b>   | 0.19       | 0.1       | -0.07    | 0.19      | 0.17       | 0.12      | -0.05       | -0.06        | 0.16        | 0.16        | 0.22       | 0.21         | 1          |            |
| <b>WQI</b>   | 0.98       | 0.11      | -0.13    | 0.97      | 0.87       | 0.46      | 0.37        | 0.31         | 0.47        | 0.68        | 0.89       | 0.46         | 0.22       | 1          |

**Suppl. Table S3.** Physico-chemical characteristics of groundwater in the Ghiss-Nekkork aquifer (May 2019).

| Wells | TDS<br>(mg/L) | pH   | T(°C) | EC<br>(µS/cm) | Na <sup>+</sup><br>(mg/L) | K <sup>+</sup><br>(mg/L) | NO <sub>3</sub> <sup>-</sup><br>(mg/L) | HCO <sub>3</sub> <sup>-</sup><br>(mg/L) | Ca <sup>2+</sup><br>(mg/L) | Mg <sup>2+</sup><br>(mg/L) | Cl <sup>-</sup><br>(mg/L) | SO <sub>4</sub> <sup>2-</sup><br>(mg/L) | Br <sup>-</sup><br>(mg/L) |
|-------|---------------|------|-------|---------------|---------------------------|--------------------------|----------------------------------------|-----------------------------------------|----------------------------|----------------------------|---------------------------|-----------------------------------------|---------------------------|
| 1     | 3155          | 7.51 | 19.53 | 6310          | 470.5                     | 5.3                      | 2.1                                    | 478.85                                  | 343.08                     | 199.68                     | 1065                      | 1311.66                                 | 4.08                      |
| 2     | 3055          | 7.44 | 18.28 | 6110          | 485                       | 6.5                      | 3.4                                    | 436.15                                  | 336.67                     | 188.16                     | 1029.5                    | 1514.34                                 | 4.12                      |
| 3     | 3122          | 7.11 | 17.78 | 6244          | 470.5                     | 7.4                      | 9                                      | 466.65                                  | 384.79                     | 201.6                      | 1047.25                   | 1479.92                                 | 4.06                      |
| 4     | 2622          | 7.28 | 8.36  | 5244          | 414.5                     | 4.1                      | 11.4                                   | 378.2                                   | 349.5                      | 176.64                     | 869.75                    | 1166.35                                 | 4.09                      |
| 5     | 1652          | 7.44 | 8.46  | 3303          | 281                       | 6.3                      | 7.1                                    | 326.35                                  | 275.75                     | 82.56                      | 461.5                     | 718.93                                  | 3.14                      |
| 6     | 1757          | 7.33 | 12.03 | 3514          | 292.5                     | 3.8                      | 6.4                                    | 335.5                                   | 285.37                     | 97.92                      | 266.25                    | 772.47                                  | 3.5                       |
| 7     | 2800          | 7.4  | 12.4  | 5601          | 417.5                     | 4.3                      | 2.9                                    | 381.25                                  | 400.8                      | 172.8                      | 1100.5                    | 1242.83                                 | 3.42                      |
| 8     | 1130          | 7.9  | 13.33 | 2901          | 236.5                     | 3.3                      | 2.4                                    | 298.9                                   | 240.48                     | 86.4                       | 426                       | 543.02                                  | 2.39                      |
| 9     | 1140          | 7.75 | 12.62 | 2280          | 236                       | 3                        | 9.7                                    | 414.8                                   | 208.42                     | 126.72                     | 568                       | 458.89                                  | 2.43                      |
| 10    | 3609          | 7.39 | 9.59  | 7218          | 536                       | 13.7                     | 5.5                                    | 445.3                                   | 333.47                     | 232.32                     | 1668.5                    | 799.23                                  | 2.38                      |
| 11    | 1934          | 8.01 | 7.91  | 3869          | 401.5                     | 45.3                     | 79.9                                   | 256.2                                   | 147.49                     | 53.76                      | 710                       | 349.9                                   | 2.46                      |
| 12    | 1935          | 7.51 | 20.43 | 3880          | 396.5                     | 2.5                      | 8.7                                    | 427                                     | 139.48                     | 85.44                      | 781                       | 151.05                                  | 1.94                      |
| 13    | 4581          | 7.71 | 21.01 | 9166          | 886                       | 17.2                     | 18.5                                   | 405.65                                  | 200.4                      | 177.6                      | 2272                      | 432.12                                  | 3.72                      |
| 14    | 3065          | 7.71 | 20.02 | 6156          | 544.5                     | 13.5                     | 11.7                                   | 332.45                                  | 156.31                     | 120                        | 1455.5                    | 279.54                                  | 3.71                      |
| 15    | 1155          | 7.79 | 12.99 | 2310          | 260.5                     | 10.7                     | 4.1                                    | 326.35                                  | 125.05                     | 61.44                      | 639                       | 64.62                                   | 3.74                      |
| 16    | 5035          | 7.75 | 15.4  | 10070         | 954                       | 29.1                     | 33.8                                   | 481.9                                   | 250.1                      | 207.36                     | 2698                      | 516.25                                  | 3.7                       |
| 17    | 2847          | 7.67 | 12    | 5695          | 438.5                     | 9.5                      | 3.4                                    | 469.7                                   | 307.81                     | 190.08                     | 1065                      | 1001.91                                 | 3.59                      |
| 18    | 2149          | 7.7  | 15.05 | 4298          | 385.5                     | 9.2                      | 2.2                                    | 340.38                                  | 216.43                     | 131.52                     | 674.5                     | 860.42                                  | 2.79                      |
| 19    | 1590          | 7.33 | 15.09 | 3180          | 298                       | 1.7                      | 8.6                                    | 433.1                                   | 192.38                     | 115.2                      | 639                       | 439.77                                  | 2.83                      |
| 20    | 3344          | 7.37 | 14.99 | 6687          | 896                       | 4.8                      | 12.9                                   | 463.6                                   | 253.3                      | 120.96                     | 1349                      | 1040.15                                 | 3.02                      |
| 21    | 1593          | 7.37 | 21.5  | 3178          | 270                       | 4                        | 3.9                                    | 341.6                                   | 184.37                     | 120                        | 568                       | 546.84                                  | 2.4                       |
| 22    | 1637          | 7.01 | 18.9  | 3280          | 262.5                     | 3.3                      | 4.3                                    | 384.3                                   | 208.42                     | 144                        | 603.5                     | 520.08                                  | 4.3                       |
| 23    | 1674          | 6.84 | 20    | 2747          | 331                       | 2.8                      | 3.2                                    | 390.4                                   | 240.48                     | 201.6                      | 603.5                     | 718.93                                  | 2.75                      |
| 24    | 2802          | 6.59 | 20.87 | 5594          | 423.5                     | 8.9                      | 23.7                                   | 420.9                                   | 272.54                     | 172.8                      | 994                       | 661.57                                  | 2.43                      |
| 25    | 2524          | 6.69 | 20.89 | 5049          | 411.5                     | 3.8                      | 9.6                                    | 420.9                                   | 288.58                     | 163.2                      | 816.5                     | 703.63                                  | 2.55                      |
| 26    | 1260          | 7.23 | 20.51 | 2305          | 288                       | 2.9                      | 4.8                                    | 305                                     | 232.46                     | 129.6                      | 461.5                     | 462.71                                  | 2.34                      |
| 27    | 1224          | 6.79 | 19.53 | 2475          | 341.5                     | 7.5                      | 9.2                                    | 384.3                                   | 264.53                     | 172.8                      | 852                       | 481.84                                  | 5.33                      |

|    |      |      |       |      |       |      |      |        |        |       |        |        |      |
|----|------|------|-------|------|-------|------|------|--------|--------|-------|--------|--------|------|
| 28 | 1699 | 7    | 20.98 | 3284 | 262.5 | 3.8  | 5.9  | 341.6  | 256.51 | 120   | 497    | 393.88 | 2.44 |
| 29 | 4019 | 6.85 | 19.7  | 8037 | 535.5 | 10.5 | 21.2 | 427    | 336.67 | 254.4 | 1775   | 546.84 | 2.48 |
| 30 | 2669 | 7.02 | 21.42 | 5337 | 443   | 9.1  | 9.1  | 340.05 | 256.51 | 182.4 | 852    | 734.23 | 2.83 |
| 31 | 2681 | 7.01 | 24.49 | 5363 | 267.5 | 3.4  | 10.2 | 430.05 | 240.48 | 153.6 | 852    | 623.33 | 3.07 |
| 32 | 1441 | 7.39 | 17.11 | 2881 | 234.5 | 3    | 6.6  | 256.2  | 216.43 | 115.2 | 745.5  | 358.58 | 3.09 |
| 33 | 2124 | 7.61 | 20.74 | 4249 | 400   | 4.6  | 7.9  | 353.8  | 192.38 | 105.6 | 674.5  | 546.84 | 3.2  |
| 34 | 2403 | 7.14 | 20.71 | 4807 | 440.5 | 4.3  | 11.2 | 439.2  | 200.4  | 86.4  | 958.5  | 342.64 | 3.44 |
| 35 | 2773 | 8    | 20.86 | 5546 | 500.5 | 5    | 15.3 | 366    | 160.32 | 148.8 | 1065   | 550.67 | 3.55 |
| 36 | 2048 | 6.78 | 22.28 | 4100 | 374   | 2.4  | 5    | 353.8  | 216.43 | 124.8 | 639    | 630.97 | 2.51 |
| 37 | 3034 | 7.24 | 22.35 | 6124 | 523.5 | 14.3 | 10.8 | 347.7  | 148.3  | 124.8 | 1349   | 321.99 | 4.2  |
| 38 | 2065 | 7.65 | 20.94 | 4148 | 339   | 14   | 13.8 | 262.3  | 204.41 | 117.6 | 852    | 274.57 | 3.73 |
| 39 | 1166 | 7.23 | 22.44 | 2286 | 218.5 | 12.1 | 3.9  | 292.8  | 124.25 | 86.4  | 568    | 69.6   | 3.74 |
| 40 | 3108 | 7.17 | 20.86 | 6216 | 449.5 | 6.2  | 18.1 | 372.1  | 200.4  | 132   | 1455.5 | 258.89 | 3.74 |
| 41 | 2393 | 7.34 | 21.05 | 4774 | 399   | 16.6 | 13   | 460.55 | 240.48 | 175.2 | 887.5  | 611.85 | 3.85 |
| 42 | 1906 | 6.95 | 25.13 | 3811 | 442   | 9    | 3.1  | 744.2  | 212.42 | 141.6 | 923    | 443.59 | 2.14 |
| 43 | 1918 | 7.41 | 25.27 | 3836 | 251.5 | 3    | 5.8  | 359.9  | 200.04 | 172.8 | 461.5  | 600.38 | 2.45 |
| 44 | 3177 | 7.53 | 21.6  | 6466 | 490   | 4.4  | 13.9 | 460.55 | 220.44 | 220.8 | 1242.5 | 630.97 | 3.18 |
| 45 | 1840 | 7.52 | 23.33 | 3679 | 396.5 | 2.9  | 0.9  | 555.1  | 132.26 | 86.4  | 674.5  | 281.84 | 3.13 |
| 46 | 2372 | 7.5  | 20.58 | 4744 | 378   | 2.6  | 5    | 298.9  | 316.63 | 136.8 | 816.5  | 722.75 | 2.98 |
| 47 | 1574 | 7.32 | 20.56 | 3153 | 272.5 | 3.2  | 5.3  | 286.7  | 208.42 | 91.2  | 426    | 500.96 | 3.44 |
| 48 | 1265 | 7.13 | 20.57 | 2530 | 214.5 | 2.1  | 5.5  | 436.15 | 160.32 | 88.8  | 213    | 314.34 | 2.91 |
| 49 | 1788 | 7.32 | 20.6  | 3575 | 322   | 2.5  | 7.2  | 375.15 | 204.41 | 110.4 | 603.5  | 489.48 | 2.96 |
| 50 | 2342 | 6.88 | 22.79 | 4697 | 443   | 3.4  | 6.7  | 411.75 | 156.31 | 110.4 | 1136   | 366.35 | 2.09 |

**Suppl. Table S4.** Water Quality Index (WQI) results for drinking and irrigation

| Wells | WQI    | Water quality classification type For drinking water | WQI    | Water quality classification type for irrigation |
|-------|--------|------------------------------------------------------|--------|--------------------------------------------------|
| w1    | 225.49 | Very poor water                                      | 207.48 | Very poor water                                  |
| w2    | 227.81 | Very poor water                                      | 212.91 | Very poor water                                  |
| w3    | 233.64 | Very poor water                                      | 216.82 | Very poor water                                  |
| w4    | 197.14 | poor water                                           | 182.21 | poor water                                       |
| w5    | 131.14 | Poor water                                           | 117.85 | Poor water                                       |
| w6    | 132.78 | Poor water                                           | 117.09 | Poor water                                       |

|            |        |                                        |        |                 |
|------------|--------|----------------------------------------|--------|-----------------|
| <b>w7</b>  | 209.06 | Very poor water                        | 196.73 | Poor water      |
| <b>w8</b>  | 103.26 | Poor water                             | 97.95  | Good water      |
| <b>w9</b>  | 103.02 | Poor water                             | 99.32  | Good water      |
| <b>w10</b> | 247.95 | Very poor water                        | 223.04 | Very poor water |
| <b>w11</b> | 186.67 | Poor water                             | 141.46 | Poor water      |
| <b>w12</b> | 125.68 | Poor water                             | 106.19 | Poor water      |
| <b>w13</b> | 291.59 | Very poor water                        | 250.67 | Very poor water |
| <b>w14</b> | 198.94 | Poor water                             | 168.64 | Poor water      |
| <b>w15</b> | 92.24  | Good water                             | 80.57  | Good water      |
| <b>w16</b> | 337.28 | Water unsuitable for drinking purposes | 291.02 | Very Poor water |
| <b>w17</b> | 206.53 | Very poor water                        | 188.44 | Poor water      |
| <b>w18</b> | 161.81 | Poor water                             | 164.44 | Poor water      |
| <b>w19</b> | 121.54 | Poor water                             | 107.94 | Poor water      |
| <b>w20</b> | 164.05 | Poor water                             | 217.21 | Very poor water |
| <b>w21</b> | 118.8  | Poor water                             | 190.91 | Poor water      |
| <b>w22</b> | 235.53 | Very poor water                        | 113.33 | Poor water      |
| <b>w23</b> | 120.79 | Poor water                             | 129.86 | Poor water      |
| <b>w24</b> | 141.35 | Poor water                             | 167.88 | Poor water      |
| <b>w25</b> | 168.37 | Poor water                             | 155.05 | Poor water      |
| <b>w26</b> | 123.29 | Poor water                             | 100.80 | Poor water      |
| <b>w27</b> | 133.05 | Poor water                             | 124.17 | Poor water      |
| <b>w28</b> | 194.92 | Poor water                             | 106.06 | Poor water      |
| <b>w29</b> | 111.73 | Poor water                             | 223.03 | Very poor water |
| <b>w30</b> | 174.68 | Poor water                             | 165.08 | Poor water      |
| <b>w31</b> | 130.87 | Poor water                             | 145.07 | Poor water      |
| <b>w32</b> | 105.42 | Poor water                             | 103.93 | Poor water      |
| <b>w33</b> | 121.07 | Poor water                             | 128.24 | Poor water      |
| <b>w34</b> | 121.27 | Poor water                             | 132.94 | Poor water      |
| <b>w35</b> | 259.92 | Very poor water                        | 159.35 | Poor water      |
| <b>w36</b> | 172.57 | Poor water                             | 128.72 | Poor water      |
| <b>w37</b> | 158.57 | Poor water                             | 165.41 | Poor water      |
| <b>w38</b> | 135.05 | Poor water                             | 126.40 | Poor water      |
| <b>w39</b> | 116.45 | Poor water                             | 79.35  | Good water      |
| <b>w40</b> | 144.48 | Poor water                             | 162.53 | Poor water      |
| <b>w41</b> | 187.19 | Poor water                             | 158.00 | Poor water      |
| <b>w42</b> | 172.62 | Poor water                             | 135.82 | Poor water      |
| <b>w43</b> | 112.17 | Poor water                             | 119.19 | Poor water      |
| <b>w44</b> | 147.48 | Poor water                             | 183.45 | Poor water      |
| <b>w45</b> | 156.52 | Poor water                             | 106.12 | Poor water      |
| <b>w46</b> | 184.69 | Poor water                             | 150.14 | Poor water      |
| <b>w47</b> | 143.83 | Poor water                             | 101.78 | Poor water      |

|            |        |            |        |            |
|------------|--------|------------|--------|------------|
| <b>w48</b> | 117.86 | Poor water | 76.76  | Good water |
| <b>w49</b> | 130.77 | Poor water | 119.86 | Poor water |
| <b>w50</b> | 124.85 | Poor water | 137.11 | Poor water |
